# Supplementary material
Source: MDPI journal article supplement (https://www.mdpi.com/2071-1050/10/7/2544)
Supplement: s1 [file s1]

## Sheet: Sheet1
DIN	Publication Title	Publication Year	Author	Database	Geographical Context	Industry	Linkage to Key Concepts	Sustainability Focus
1	"Lean and Green" at a Romanian secondary Tissue Paper and Board Mill - Putting Theory into Practice	2006	Vais et al.	Science Direct	Europe	Wood Products	LM + Sust.	Environmental + Social + Economic
2	The Impact of Integrated Practices of Lean, Green and Social Management Systems on Firm Sustainability Performance - Evidence from Chinese Fashion Auto-Parts Suppliers	2015	Wu et al.	Other	Asia	Automotive	LM + Sust.	Environmental + Social + Economic
3	A Case Study: Characteristics of Work Organization in Lean Production and Sociotechnical Systems	1996	Niepce and Molleman	Emerald Insight	Europe	Theoretical/Conceptual	LM + Sust.	Social
4	A Decision-making Model For Lean, Agile, Resilient and Green Supply Chain Management	2012	Cabral et al.	Taylor&Francis	Europe	Automotive	LSCM + Sust.	Environmental + Economic
5	A Framework to Improve Construction Processes: Integrating Lean, Green and Six Sigma	2014	Banawi and Bilec	Taylor&Francis	USA	Construction	LM + LSCM + Sust.	Environmental
6	A fuzzy goal programming approach for green supply chain optimisation under activity-based costing and performance evaluation with a value-chain structure	2009	Tsai and Hung	Taylor&Francis	Asia	Electronics	LM + LSCM + Sust.	Environmental + Economic
7	A Lean & Green Model for a Production Cell	2014	Pampanelli et al.	Science Direct	Multi-Regional	Automotive	LM + Sust.	Environmental + Economic
8	A Lean Based Overview on Sustainability of Printed Circuit Board Production Assembly	2015	Esfandyari et al.	Science Direct	Europe	Electronics	LM + Sust.	Environmental + Economic
9	A Model for Evaluating Lean, Agile, Resilient and Green Practices Interoperability in Supply Chains	2011	Espadinha-Cruz et al.	Other	Europe	Automotive	LSCM + Sust.	Environmental + Social + Economic
10	A modified FMEA approach to enhance reliability of lean systems	2010	Sawhney et al.	Emerald Insight	USA	Theoretical/Conceptual	LM + Sust.	Economic
11	A New Integrated Lean Manufacturing Model for Magnesium Products	2009	D'Errico et al.	Springer Link	Multi-Regional	Metal	LM + Sust.	Environmental
12	A Proposed Framework to Assess Upstream Supply Chain Sustainability	2016	Azevedo et al.	Springer Link	Europe	Theoretical/Conceptual	LM + LSCM + Sust.	Environmental + Social + Economic
13	A Simulation for Optimum Terminal Truck Number in a Turkish Port Based on Lean and Green Concept	2010	Esmer et al.	Science Direct	Europe	Transportation/Cargo	LM + Sust.	Environmental
14	A Trade-off Model for Green Supply Chain Planning: A Leanness-versus-greenness analysis	2015	Fahimnia et al.	Science Direct	Ocenia	Metal	LSCM + Sust.	Environmental + Economic
15	An Empirical Study of the Impact of Lean Consturction Techniques on Sustainable Construction in the UK	2014	Ogunbiyi et al.	Emerald Insight	Europe	Construction	LM + Sust.	Environmental + Social + Economic
16	An Empirical Study on Applicability of Lean and Green Practices in the Foundry Industry	2016	Prasad et al.	Emerald Insight	Asia	Foundry/Casting/Molding	LM + Sust.	Environmental + Economic
17	An environmental perspective on lean production	2008	Herrmann et al.	Springer Link	Europe	Theoretical/Conceptual	LM + Sust.	Environmental
18	An Exploratory Study of Best Lean Sustainability Practices in Higher Education	2005	Comm and Mathaisel(b)	Emerald Insight	USA	Service/Education	LM + Sust.	Economic
19	Lean Management, Supply Chain Management and Sustainability: A Litearature Review	2014	Martinez-Jurado and Moyano-Fuentes	Science Direct	Europe	Literature Review	LM + LSCM + Sust.	Environmental + Social + Economic
20	An Investigation of the Applicability of Sustainability and Lean Concepts to Small Construction Projects	2012	Koranda et al.	Springer Link	USA	Construction	LM + Sust.	Environmental + Economic
21	An investigation on lean-green implementation practices in Indian SMEs using analytical hierarchy process (AHP) approach	2016	Thanki et al.	Science Direct	Asia	Multi-Sectoral	LM + Sust.	Environmental + Economic
22	Analysis of Environmental Sustainability Practices Across Upstream Supply Chain Management	2015	Pimenta and Ball	Science Direct	Multi-Regional	Theoretical/Conceptual	LSCM + Sust.	Environmental
23	Application of Computer-Aided Tools for Achieving Environmental Sustainability	2006	Vijayan et al.	Wiley Online	USA	Theoretical/Conceptual	LM + Sust.	Environmental + Social + Economic
24	Application of Interpretive Structural Modelling for Analysing the Factors Influencing Integrated Lean Sustainable System	2016	Vinodh et al.	Springer Link	Asia	Automotive	LM + Sust.	Environmental + Economic
25	Applying the DOE toolkit on a Lean-and-Green Six Sigma Maritime-Operation Improvement Project	2011	Besseris	Emerald Insight	Europe	Transportation/Cargo	LM + Sust.	Environmental + Economic
26	Are Agile and Lean Manufacturing Systems Employing Sustainability, Complexity and Organizational Learning?	2012	Flumerfelt et al.	Emerald Insight	Multi-Regional	Theoretical/Conceptual	LM + Sust.	Economic
27	Are Lean and Green Programs Synergistic?	2009	Bergmiller and McCright	Other	USA	Multi-Sectoral	LM + Sust.	Environmental + Economic
28	Assessing Green Supply Chain Practices in the Ghanaian Mining Industry: A Framework and Evaluation	2016	Kusi-Sarpong et al.	Science Direct	Africa	Mining	LM + Sust.	Environmental + Social + Economic
29	Assessing the Environmental Impacts of a Lean Supply System: Case Study of High-Rise Condominium Construction in Korea	2010	Kim et al.	Other	Asia	Construction	LSCM + Sust.	Environmental
30	Assessment of Lean and Green Strategies by Simulation of Manufacturing Systems in Discrete Production Environments	2013	Diaz-Elsayed et al.	Science Direct	USA	Automotive	LM + Sust.	Economic
31	Benchmarking for Sustainability: An Application to the Sustainable Construction Industry	2010	Presley and Meade	Emerald Insight	USA	Construction	LM + Sust.	Environmental + Social + Economic
32	Benchmarking Sustainability Practices:Evidence From Manufacturing Firms	2012	Hong et al.	Emerald Insight	Multi-Regional	Multi-Sectoral	LM + LSCM + Sust.	Environmental + Social + Economic
33	Beyond the Business Case for Corporate Sustainability	2002	Dyllick and Hockerts	Wiley Online	Europe	Theoretical/Conceptual	LM + Sust.	Environmental + Social + Economic
34	Building a More Complete Theory of Sustainable Supply Chain Management Using Case Studies of 10 Exemplars	2009	Pagell and Wu	Wiley Online	Multi-Regional	Multi-Sectoral	LSCM + Sust.	Environmental + Social + Economic
35	Building Sustainability in Logistics Operations: A research Agenda	2011	Dey et al.	Emerald Insight	USA	Theoretical/Conceptual	LSCM + Sust.	Environmental + Economic
36	Business Graduate Skills in Sustainability	2011	Mather et al.	Emerald Insight	Ocenia	Service/Education	LM + Sust.	Social
37	Can standard operating procedures be motivating? Reconciling process variability issues and behavioural outcomes	2005	De Treville et al.	Taylor&Francis	USA	Theoretical/Conceptual	LM + Sust.	Social
38	Carbon Emission Assessment for Steel Structure Based on Lean Construction Process	2014	Fu et al.	Springer Link	Asia	Construction	LM + Sust.	Environmental
39	Case study: Honda of America Manufacturing, Inc.: can lean production practices increase environmental performance	1998	Maxwell et al.	Wiley Online	USA	Automotive	LM + Sust.	Environmental + Economic
40	Sustainable Manufacturing: The Lean and Green Business Model	2015	Pampanelli et al.(b)	Springer Link	Multi-Regional	Aerospace/Aviation	LM + Sust.	Environmental + Social + Economic
41	Clean-Lean Administrative Processes: A Case Study on Sediment Pollution During Construction	2016	Belayutham et al.	Science Direct	Ocenia	Construction	LM + Sust.	Environmental + Economic
42	Combining Lean and Green in Manufacturing: A Model of Waste Management	2013	Fercoq et al.	Science Direct	Europe	Multi-Sectoral	LM + Sust.	Environmental
43	Combining Lean and Sustainable Concepts with Systems Engineering for Manufacturing Enterprises	2011	Nakano	Wiley Online	Asia	Theoretical/Conceptual	LM + Sust.	Economic
44	Combining organizational performance with sustainable development issues: the Lean and Green Project Benchmarking repository	2014	Verrier et al.	Science Direct	Europe	Multi-Sectoral	LM + Sust.	Environmental + Social + Economic
45	Commercial Lean Thinking in Commercial Management	2011	Zimina and Pasquire	Emerald Insight	Europe	Construction	LM + Sust.	Social + Economic
46	Concurrent multi-response optimization of austenitic stainless steel surface roughness driven by embedded lean and green indicators	2014	Besseris and Kremmydas	Science Direct	Europe	Metal	LM + Sust.	Environmental + Economic
47	Corporate Strategy and the Environment: Towards a Four-Dimensional Compatibility Model for Fostering Green Management Decisions	2014	Martinez	Emerald Insight	Europe	Food/Agriculture	LM + Sust.	Environmental + Social + Economic
48	Corporate Sustainability Approaches and Governance Mechanisms in Sustainable Supply Chain Management	2016	Formentini and Taticchi	Science Direct	Europe	Multi-Sectoral	LSCM + Sust.	Environmental + Social + Economic
49	Could lean production job design be intrinsically motivating? Contextual, configurational, and levels-of-analysis issues	2006	De Treville and Antonakis	Science Direct	Europe	Theoretical/Conceptual	LM + Sust.	Social
50	Cross-Functional Executive Involvement in Lean Manufacturing and Sustainability Alignment	2015	Longoni and Cagliano	Emerald Insight	Europe	Multi-Sectoral	LM + Sust.	Environmental + Social + Economic
51	Developing Performance Management Systems for the Green Supply Chain	2014	Mutingi et al.	Springer Link	Africa	Theoretical/Conceptual	LSCM + Sust.	Environmental + Social + Economic
52	Development of a Lean Maturity Model for Operational Level Planning	2016	Maasouman and Demirli	Springer Link	Europe	Other Manufacturing	LM + Sust.	Economic
53	Development of Framework for Sustainable Lean Implementation an ISM Approach	2014	Jadhav et al.	Springer Link	Asia	Theoretical/Conceptual	LM + Sust.	Economic
54	Do Green Supply Chains Lead to Competitiveness and Economic Performance	2005	Rao and Holt	Emerald Insight	Asia	Multi-Sectoral	LSCM + Sust.	Environmental + Economic
55	Does Lean Mean Green?	2014	Dhingra et al.	Science Direct	USA	Literature Review	LM + Sust.	Environmental + Social
56	Does Lean Mean Green? The implications of Lean Production for Environmental Management	1993	Maxwell et al.(b)	Other	USA	Automotive	LM + Sust.	Environmental
57	Dynamic Capabilities and Sustainable Supply Chain Management	2012	Beske	Emerald Insight	Europe	Theoretical/Conceptual	LSCM + Sust.	Economic
58	Effects of a Green Purchasing Strategy: the Case of Belfast City Council	2000	Murray	Emerald Insight	Europe	Government	LSCM + Sust.	Environmental + Economic
59	Efficiency and Sustainability Through the Best Practices in the Logistics Social Responsibility Framework	2016	Mejias et al.	Emerald Insight	Europe	Literature Review	LSCM + Sust.	Environmental + Economic
60	Energy Vlaue Stream Mapping a Tool to Develop Green Manufacturing	2016	Verma and Sharma	Science Direct	Asia	Other Manufacturing	LM + Sust.	Environmental + Economic
61	En-Lean: a framework to align lean and green manufacturing in the metal cutting supply chain.	2007	Sawhney et al.(b)	Wiley Online	USA	Metal	LM + Sust.	Environmental
62	Ensuring Supply Chain Resilience: Development of a Conceptual Framework	2010	Pettit et al.	Wiley Online	USA	Theoretical/Conceptual	LSCM + Sust.	Economic
63	Environmental management and operational performance in automotive companies in Brazil: the role of human resource management and lean manufacturing	2013	Jabbour et al.	Science Direct	South America	Automotive	LM + Sust.	Environmental
64	Environmental Strategies: Lean and Green	1994	Davids	Emerald Insight	USA	Theoretical/Conceptual	LM + Sust.	Environmental
65	Environmental Sustainability of Logistics Service Provider: an ANP-QFD approach	2015	Lam and Dai	Emerald Insight	Asia	Transportation/Cargo	LSCM + Sust.	Environmental + Economic
66	Exploring lean and green supply chain performance using balanced scorecard perspective	2011	Duarte et al.	Other	Europe	Theoretical/Conceptual	LSCM + Sust.	Environmental + Social + Economic
67	Exploring synergetic effects between investments in environmental and quality/lean practices in supply chains	2013	Wiengarten and Onofrei	Emerald Insight	Europe	Multi-Sectoral	LSCM + Sust.	Environmental + Economic
68	Exploring the Greening of the Food Supply Chain with Lean Thinking Techniques	2013	Folinas et al.	Science Direct	Europe	Food/Agriculture	LSCM + Sust.	Environmental
69	Exploring the Integration of Sustainability and Supply Chain Management	2013	Winter and Knemeyer	Emerald Insight	Multi-Regional	Literature Review	LSCM + Sust.	Environmental + Social + Economic
70	Exploring the Role of Supplier Relationship Management for Sustainable Operations: An OR Perspective	2014	Sharif et al.	Springer Link	Asia	Multi-Sectoral	LSCM + Sust.	Economic
71	Extending the Horizons: Environmental Excellence as Key to Improving Operations	2006	Corbett and Klassen	Other	USA	Multi-Sectoral	LM + LSCM + Sust.	Environmental
72	Extension of Process Mapping to Identify "Green Waste"	2014	White and James	Emerald Insight	Europe	Automotive	LM + Sust.	Environmental
73	Green and Competitive: Empirical Evidence from ISO 9001 Certified Brazilian Companies	2015	Jabbour et al.	Emerald Insight	South America	Multi-Sectoral	LM + Sust.	Environmental + Economic
74	Green and Lean Control of Cyclic Pallet Systems	2011	Mashaei et al.	Other	Europe	Theoretical/Conceptual	LM + Sust.	Economic
75	Green and Lean Sustainable Development Path in China: Guanxi, practices and performance	2016	Zhan et al.	Science Direct	Asia	Multi-Sectoral	LM + Sust.	Social + Economic
76	Green as the new Lean: how to use Lean practices as a catalyst to greening your supply chain	2013	Dues et al.	Science Direct	Europe	Theoretical/Conceptual	LSCM + Sust.	Environmental + Economic
77	Green Benefits From Adopting Lean Manufacturing: A Case Study From Automotive Sector	2013	Sobral et al.	Wiley Online	South America	Automotive	LM + Sust.	Environmental
78	Green Lean and the Need for Six Sigma	2015	Garza-Reyes	Emerald Insight	Europe	Theoretical/Conceptual	LM + Sust.	Environmental + Economic
79	Green Lean Total Quality Information Management in Malaysian Automotive Companies	2012	Mohd.Salleh et al.	Science Direct	Asia	Automotive	LM + Sust.	Economic
80	Green Manufacturing: It’s Tools and Techniques That Can Be Implemented in Manufacturing Sectors	2015	Maruthi and Rashmi	Science Direct	Asia	Theoretical/Conceptual	LM + Sust.	Environmental + Economic
81	Green Purchasing and Suplly Policies: Do they improve companies' environmental performance?	1998	Green et al.	Emerald Insight	Europe	Retail	LSCM + Sust.	Environmental
82	Green Suppliers Network: Strengthening and Greening the Manufacturing Supply Base	2005	Karp	Wiley Online	USA	Multi-Sectoral	LSCM + Sust.	Environmental + Economic
83	Green Supply Chain Management: Practices and Tools for Logistics Competitiveness and Sustainability. The DHL Case Study	2015	Cosimato and Troisi	Emerald Insight	Europe	Transportation/Cargo	LSCM + Sust.	Environmental + Economic
84	Green, lean, and global supply chains	2010	Mollenkopf et al.	Emerald Insight	USA	Theoretical/Conceptual	LSCM + Sust.	Environmental
85	Human Behavior Based Exploratory Model for Succesful Implementation of Lean Enterprise in Industry	2005	Sawhney	Wiley Online	USA	Other Manufacturing	LM + Sust.	Social
86	Impact of Green Manufacturing Practices on Organisational Performance in Indian Context: An Empirical Study	2016	Rehman et al.	Science Direct	Asia	Multi-Sectoral	LM + Sust.	Environmental + Economic
87	Impact of lean manufacturing and environmental management on business performance: An empirial study of manufacturing firms	2011	Yang et al.	Science Direct	USA	Multi-Sectoral	LM + Sust.	Environmental
88	Implications of lean manufacturing for human resource strategy	1995	Forrester	Emerald Insight	Europe	Theoretical/Conceptual	LM + Sust.	Social
89	Incorporate Lean and Green Concepts to Enhance the Productivity of Transshipment Terminal Operations	2016	Chandrakumar et al.	Science Direct	Asia	Transportation/Cargo	LM + LSCM + Sust.	Economic
90	Influence of Green and Lean Upstream Supply Chain Management Practices on Business Sustainability	2012	Azevedo et al.(b)	Other	Europe	Automotive	LSCM + Sust.	Environmental + Social + Economic
91	Information infrastructures for on-line measurement of non-productive greenhouse gas emissions in manufacturing: case of the brewing industry	2012	Lees et al.	Taylor&Francis	Ocenia	Food/Agriculture	LM + Sust.	Environmental + Economic
92	Integrated Green Supply Chain Management and Operational Performance	2014	Yu et al.	Emerald Insight	Multi-Regional	Automotive	LSCM + Sust.	Environmental + Economic
93	Integrated lean TQM model for global sustainability and competitiveness	2010	Ho	Other	Europe	Multi-Sectoral	LM + Sust.	Economic
94	Integrated Lean TQM Model for Sustainable Development	2010	Ho	Emerald Insight	Asia	Multi-Sectoral	LM + Sust.	Environmental + Social + Economic
95	Integrating and Implementing Lean and Green Practices Based on Proposition of Carbon- Value Efficiency Metric	2015	Ng et al.	Science Direct	Asia	Metal	LM + Sust.	Environmental + Economic
96	Integrating Lean and Green Management	2016	Cory	Emerald Insight	USA	Literature Review	LM + Sust.	Environmental + Economic
97	Integrating Lean and Green Paradigms in Maintenance Management	2014	Jasiulewicz - Kaczmarek	Science Direct	Europe	Maintenance	LM + Sust.	Environmental + Social + Economic
98	Integrating Multiple Manufacturing Initiatives: Challenge for Automotive Suppliers	2007	Johnson et al.	Emerald Insight	USA	Automotive	LM + Sust.	Environmental + Economic
99	Integration of green lean approach with six sigma: an application for flue gas emissions	2016	Sagnak and Kazancoglu	Science Direct	Europe	Multi-Sectoral	LM + Sust.	Environmental
100	Integration Of Lean And Green Supply Chain - Impact On Manufacturing Firms In Improving Environmental Efficiencies	2011	Parveen et al.	Other	Asia	Other Manufacturing	LM + LSCM + Sust.	Environmental + Economic
101	Investigating Lean and Green Supply Chain Linkages Through a Balanced Scorecard Framework	2015	Duarte and Cruz-Machado	Taylor&Francis	Europe	Theoretical/Conceptual	LSCM + Sust.	Environmental + Social + Economic
102	LARG index: A Benchmarking Tool for Improving the Leanness, Agility, Resilience and Greenness of the Automotive Supply Chain	2016	Azevedo et al.(c)	Emerald Insight	Europe	Automotive	LSCM + Sust.	Environmental + Economic
103	Lean and Agile Construction Project Management: As a way of Reducing Environmental Footprint of the Construction Industry	2014	Sertyesilisik	Springer Link	Europe	Construction	LM + Sust.	Environmental + Economic
104	Lean and Green - A Systematic Review of the State of the Art Literature	2015	Garza-Reyes(b)	Science Direct	Europe	Literature Review	LM + LSCM + Sust.	Environmental + Economic
105	Why Research in Sustainable Supply Chain Management Should Have No Future	2014	Pagell and Shevchenko	Wiley Online	Multi-Regional	Theoretical/Conceptual	LSCM + Sust.	Environmental + Economic
106	Lean and Green in Action: Interdependencies and Performance of Pollution Prevention Projects	2014	Galeazzo et al.	Science Direct	Europe	Other Manufacturing	LM + Sust.	Environmental + Social + Economic
107	Lean and Green in the Transport and Logistics Sector - A Case Study of Simultaneous Deployment	2016	Garza-Reyes et al.	Taylor&Francis	South America	Transportation/Cargo	LSCM + Sust.	Environmental + Economic
108	Lean and Green Integration into Production System Models - Experiences from Swedish Industry	2014	Kurdve et al.	Science Direct	Europe	Automotive	LM + Sust.	Environmental + Social + Economic
109	Lean and Green Product Development: Two Sides of the Same Coin?	2014	Johansson and Sundin	Other	Europe	Literature Review	LM + Sust.	Environmental + Economic
110	Lean and Green Strategy: The Lean and Green House and Maturity Deployment Model	2016	Verrier et al.(b)	Science Direct	Europe	Theoretical/Conceptual	LM + Sust.	Environmental + Economic
111	Lean and Green Supply Chain for the Product-Services System (PSS): The Literature Review and A Conceptual Framework	2016	Li and Found	Science Direct	Europe	Theoretical/Conceptual	LSCM + Sust.	Environmental
112	Waste as the Common Gene Connecting Cleaner Production and Lean Manufacturing: A Proposition of a Hybrid Definition	2015	Cobra et al.	Wiley Online	South America	Theoretical/Conceptual	LM + Sust.	Environmental + Social
113	Lean and Green Synergies in Supply Chain Management	2016	Campos and Vazquez-Brust	Emerald Insight	South America	Consumer Goods	LM + LSCM + Sust.	Environmental + Social + Economic
114	Lean and Green: A Business Model Framework	2013	Duarte and Cruz-Machado(b)	Springer Link	Europe	Theoretical/Conceptual	LM + Sust.	Environmental + Social + Economic
115	Lean and Green: The Move to Environmentally Conscious Manufacturing	1996	Florida	Other	USA	Multi-Sectoral	LM + LSCM + Sust.	Environmental
116	LEAN AND GREEN? AN EMPIRICAL EXAMINATION OFTHE RELATIONSHIP BETWEEN LEAN PRODUCTION AND ENVIRONMENTAL PERFORMANCE	2001	King and Lenox	Wiley Online	USA	Multi-Sectoral	LM + Sust.	Environmental
117	Lean and performance measurement	2008	Bhasin	Emerald Insight	Europe	Theoretical/Conceptual	LM + Sust.	Economic
118	Lean Construction: Towards enhancing sustainable construction in Malaysia	2012	Marhani et al.	Science Direct	Asia	Construction	LM + Sust.	Social + Economic
119	Lean Healthcare in Developing Countries: Evidence from Brazilian Hospitals	2015	Costa et al.	Wiley Online	South America	HealthCare	LM + Sust.	Social + Economic
120	Lean in Novartis Pharma: Sustainability Through a Five Step Deployment Methodology	2013	Dreamer and Niewiarowski	Springer Link	Europe	Pharmaceuticals	LM + Sust.	Economic
121	Lean Logistics	1997	Jones et al.	Emerald Insight	Europe	Theoretical/Conceptual	LSCM + Sust.	Economic
122	Lean Managament - A Step Towards Sustainable Green Supply Chain	2016	Kumar BR et al.	Emerald Insight	Asia	Aerospace/Aviation	LSCM + Sust.	Environmental + Economic
123	Lean Management and Supply Management: their role in green practices and performance	2013	Hajmohammad et al.	Science Direct	Canada	Multi-Sectoral	LM + LSCM + Sust.	Environmental
124	Lean manufacturing, non-financial performance measures, and financial performance	2009	Fullerton and Wempe	Emerald Insight	USA	Multi-Sectoral	LM + Sust.	Economic
125	Lean Maturity, Lean Sustainability	2007	Jorgensen et al.	Springer Link	Europe	Multi-Sectoral	LM + Sust.	Economic
126	Lean Production and EMSs: Aligning Environmental Management with Business Priorities	2005	Tice et al.	Wiley Online	USA	Theoretical/Conceptual	LM + Sust.	Environmental + Economic
127	Lean production and sustainable competitive advantage	2000	Lewis	Emerald Insight	Europe	Automotive	LM + Sust.	Economic
128	Lean Production and the Internet	2004	Bruun and Mefford	Science Direct	Europe	Multi-Sectoral	LM + LSCM + Sust.	Economic
129	Lean Supply Chain and Its Effect on Product Cost and Quality: A Case Study on Ford Motor Company	2009	Wee and Wu	Emerald Insight	Asia	Automotive	LSCM + Sust.	Economic
130	Lean Sustainability Audit	2015	Bhasin(b)	Springer Link	Europe	Theoretical/Conceptual	LM + Sust.	Economic
131	Lean Value Stream Manufacturing for Sustainability	2011	Mohammed and Sadique	Springer Link	Multi-Regional	Theoretical/Conceptual	LM + Sust.	Environmental + Economic
132	Lean versus green:The impact of lean logistics on green house gas emissions in consumer goods supply chains	2016	Ugarte et al.	Science Direct	USA	Consumer Goods	LSCM + Sust.	Environmental
133	Lean and Low Environmental Impact Manufacturing	2009	Found	Other	Europe	Theoretical/Conceptual	LM + Sust.	Environmental + Economic
134	Lean vs Agile in the Context of Complexity Management in Organizations	2012	Putnik and Putnik	Emerald Insight	Europe	Theoretical/Conceptual	LM + Sust.	Economic
135	Lean, agile, resilient and green: divergencies and synergies	2011	Carvalho et al.	Emerald Insight	Europe	Theoretical/Conceptual	LM + LSCM + Sust.	Environmental
136	Lean, Green and Resilient Practices Influence on Supply Chain Performance: Interpretive Structural Modeling Approach	2015	Govindan et al.	Springer Link	Europe	Automotive	LSCM + Sust.	Environmental + Economic
137	Lean, Green, and the quest for superior environmental performance	2001	Rothenberg et al.	Wiley Online	USA	Automotive	LM + Sust.	Environmental
138	Lean/Green Integration Focused on Waste Reduction Techniques	2016	Fercoq et al.(b)	Science Direct	Europe	Electronics	LM + Sust.	Environmental + Economic
139	Leaning into Sustainability at University of Alberta Libraries	2016	Beasley and Rosseel	Emerald Insight	Canada	Service/Education	LM + Sust.	Economic
140	Learning to evolve: A review of contemporary lean thinking	2004	Hines et al.	Emerald Insight	Europe	Theoretical/Conceptual	LM + Sust.	Economic
141	Sustainability and corporate social responsibility in supply chains: The state of research in supply chain management and business ethics journals	2016	Quarshie et al.	Science Direct	Europe	Literature Review	LSCM + Sust.	Environmental + Social + Economic
142	Low Energy Production Impact on Lean Flow	2015	Ball	Emerald Insight	Europe	Other Manufacturing	LM + Sust.	Environmental + Economic
143	Managing complexity of environmental assessments of complex industrial systems with a lean 6 sigma approach	2010	Cluzel et al.	Other	South America	Electronics	LM + Sust.	Environmental + Economic
144	Managing Imbalanced Supply Chain Relationships for Sustainability: A Power Perspective	2014	Toubolic et al.	Wiley Online	Europe	Food/Agriculture	LSCM + Sust.	Economic
145	Managing Innovation for Sustainability	2012	Seebode et al.	Wiley Online	Europe	Electronics	LM + Sust.	Environmental
146	Managing Sustainable Production: A Framework for Integrating Sustainability in the Manufacturing Sector	2012	Greenberg and Quillian	Wiley Online	Multi-Regional	Theoretical/Conceptual	LM + Sust.	Environmental + Social + Economic
147	shared.value.chain: Profitable Growth Through Sustainable Value Creation	2015	D'Heur	Springer Link	Europe	Theoretical/Conceptual	LM + Sust.	Environmental + Social + Economic
148	Measuring Supply Chain Efficiency from a Green Perspective	2011	Kim and Min	Emerald Insight	Multi-Regional	Theoretical/Conceptual	LSCM + Sust.	Environmental
149	Model of efficient and sustainable improvements in a lean production system through processes of environmental innovation	2013	Aguado et al.	Science Direct	Europe	Metal	LM + Sust.	Environmental
150	Modelling Lean and Green: A Review From Business Models	2013	Duarte and Cruz-Machad©	Emerald Insight	Europe	Theoretical/Conceptual	LM + LSCM + Sust.	Environmental + Social + Economic
151	Modelling Lean, Agile, Resilient, and Green Supply Chain Management	2011	Cabral et al.(b)	Other	Europe	Theoretical/Conceptual	LSCM + Sust.	Economic
152	Off the rails: understanding the derailment of a lean manufacturing initiative	2012	Turesky and Connell	Taylor&Francis	USA	Automotive	LM + Sust.	Economic
153	Organizing Life Cycle Managament in Practice: Challenges of a Multinational Manufacturing Corporation	2014	Nilsson-Linden et al.	Springer Link	Europe	Other Manufacturing	LM + LSCM + Sust.	Environmental + Social + Economic
154	Perfect complements: synergies between lean production and eco-sustainability initiatives.	2004	Larson and Greenwood	Wiley Online	USA	Theoretical/Conceptual	LM + Sust.	Environmental
155	Principles and Business Improvement Initiatives of Lean Relates to Environmental Management System	2011	Puvanasvaran et al.	Other	Asia	Multi-Sectoral	LSCM + Sust.	Environmental + Economic
156	Process Improvement programmes: a model for assessing sustainability	2002	Bateman and David	Emerald Insight	Europe	Automotive	LM + Sust.	Economic
157	Production Management model integrating the principles of lean manufacturing and sustainability supported by the cultural transformation of a company	2015	Alves and Alves	Taylor&Francis	South America	Theoretical/Conceptual	LM + Sust.	Environmental + Social + Economic
158	Profiling the Resiliency and Sustainability of UK Manufacturing Companies	2016	Thomas et al.	Emerald Insight	Europe	Multi-Sectoral	LM + Sust.	Economic
159	Purchasing and Environmental Management: Interactions, Policies and Opportunities	1996	Green et al.	Wiley Online	Europe	Multi-Sectoral	LSCM + Sust.	Environmental + Economic
160	Purchasing for Lean Production: The New Strategic Agenda	1996	Hines	Wiley Online	Europe	Theoretical/Conceptual	LSCM + Sust.	Economic
161	Quality Toolbox. Implementing a Sustainability Management System	2012	Pojasek	Wiley Online	USA	Theoretical/Conceptual	LM + Sust.	Environmental + Social + Economic
162	Quality Toolbox. Lean, Six Sigma, and the Systems Approach: Management Initiatives for Process Improvement	2003	Pojasek	Wiley Online	USA	Theoretical/Conceptual	LM + Sust.	Environmental
163	Quality Toolbox: Framing Your Lean-to-Green Effort	2008	Pojasek	Wiley Online	USA	Theoretical/Conceptual	LM + LSCM + Sust.	Environmental + Economic
164	Value-value Load Diagram: A Graphical Tool for Lean-Green Performance Assessment	2016	Thanki and Thakkar	Taylor&Francis	Asia	Theoretical/Conceptual	LM + Sust.	Environmental + Economic
165	Research Opportunities in Supply Chain Management	2010	Stock et al.	Springer Link	USA	Theoretical/Conceptual	LSCM + Sust.	Environmental + Economic
166	RFID for the Extended Lean Enterprise	2012	Powell and Skjelstad	Emerald Insight	Europe	Theoretical/Conceptual	LSCM + Sust.	Economic
167	Role of Green Policy on Sustainable Supply Chain Management: A Model for Implementing Corporate Social Responsibility (CSR)	2016	Bhardwaj	Emerald Insight	Asia	Multi-Sectoral	LSCM + Sust.	Environmental + Social + Economic
168	Safety Improvements From Health Lean Management Implementation: Evidences From Three cases	2016	Crema and Verbano	Emerald Insight	Europe	HealthCare	LM + Sust.	Social
169	Safety Reloaded: Lean Operations and High Involvement Work Practices for Sustainable Workplaces	2015	Camuffo et al.	Springer Link	Europe	Automotive	LM + Sust.	Social
170	Seeing Ecology and "Green" Innovations as a Source of Change	1998	Azzone and Noci	Emerald Insight	Europe	Multi-Sectoral	LM + Sust.	Environmental + Economic
171	Simulation Based Assessment of Lean and Green Strategies in Manufacturing Systems	2015	Greinacher et al.	Science Direct	Europe	Theoretical/Conceptual	LM + Sust.	Environmental + Economic
172	Six Sigma For Sustainability in Multinational Organizations	2011	AlSagheer et al.	Other	Multi-Regional	Multi-Sectoral	LM + Sust.	Environmental + Social + Economic
173	Staying Lean: Thriving, not just surviving	2008	Hines et al.(b)	Other	Europe	Theoretical/Conceptual	LM + Sust.	Economic
174	Strategic Outsourcing: A Lean tool of Healthcare Supply Chain Management	2013	Guimaraes and Carvalho	Emerald Insight	Europe	HealthCare	LSCM + Sust.	Social + Economic
175	Structure of the Japanese Production System: Elusiveness and Reality	2004	Suzuki	Springer Link	Asia	Theoretical/Conceptual	LM + Sust.	Social
176	Supply Chain Management for Sustainable Products - Insights From Research Applying Mixed Methodologies	2011	Seuring	Wiley Online	Europe	Multi-Sectoral	LSCM + Sust.	Environmental + Social + Economic
177	Supply Chain Management with Lean Production and RFID Application: A Case Study	2013	Chen et al.	Science Direct	Asia	Maintenance	LSCM + Sust.	Economic
178	Supply Chain Performance Management: Lean and Green Paradigms	2010	Carvalho et al.(b)	Other	Europe	Theoretical/Conceptual	LSCM + Sust.	Environmental + Economic
179	Supply Chain Processes: Linking Supply Logistics Integration, Supply Performance, Lean Processes and Comptetitive Performance	2016	Prajogo et al.	Emerald Insight	Ocenia	Other Manufacturing	LSCM + Sust.	Economic
180	Supply Chain Sustainability: A Risk Management Approach	2016	Giannakis and Papadopoulos	Science Direct	Europe	Multi-Sectoral	LSCM + Sust.	Environmental + Social + Economic
181	Supporting Collaboration in the Development and Management of Lean Supply Networks	2008	Adamides et al.	Taylor&Francis	Europe	Theoretical/Conceptual	LSCM + Sust.	Economic
182	Sustainability in Higher Education: A Systematic Review with Focus on Management Education	2015	Figueiro and Raufflet	Science Direct	Multi-Regional	Service/Education	LM + Sust.	Environmental + Social
183	Sustainability in Manufacturing and Factories of the Future	2014	Herrmann et al.(b)	Springer Link	Europe	Theoretical/Conceptual	LM + Sust.	Environmental + Social + Economic
184	Sustainability in Manufacturing Operations Scheduling: A State of the Art Review	2015	Giret et al.	Science Direct	Europe	Literature Review	LM + Sust.	Environmental + Economic
185	Sustainability in the Supply Chain Through Synchronization of Demand and Supply in ETO-Companies	2015	Dallasega et al.	Science Direct	Europe	Construction	LM + LSCM + Sust.	Environmental + Social + Economic
186	Sustainability through Lean Construction Approach: A Literature Review	2013	Marhani et al.(b)	Science Direct	Asia	Construction	LM + Sust.	Social + Economic
187	Sustainability to support end-to-end Value Chains: The Role of Supply Chain Management	2011	Closs et al.	Springer Link	USA	Multi-Sectoral	LSCM + Sust.	Environmental + Social + Economic
188	Sustainability, Lean and Eco-Efficiency Symbioses	2016	Alves et al.	Springer Link	Multi-Regional	Literature Review	LM + Sust.	Environmental + Economic
189	Sustainability: the elusive element of process improvement	2005	Bateman	Emerald Insight	Europe	Automotive	LM + Sust.	Economic
190	Sustainability: The new Lean Frontier	2010	Fliedner and Majeske	Other	USA	Theoretical/Conceptual	LM + LSCM + Sust.	Social + Economic
191	Sustainable Green Supply Chain Management: Trends and Current Practices	2016	Singh and Trivedi	Emerald Insight	USA	Literature Review	LSCM + Sust.	Environmental + Economic
192	Sustainable Lean in Psychiatry? Assessment Through Socio-Technical Principles	2016	Lindskog et al.	Emerald Insight	Europe	HealthCare	LM + Sust.	Social
193	Sustainable Manufacturing-greening process using specific Lean Production Tools: An Empirical Observation From European Motorcycle Component Manufacturers	2014	Chiarini	Science Direct	Europe	Automotive	LM + Sust.	Environmental
194	Trends and Challenges in Process Safety	2015	Mannan et al.	Wiley Online	USA	Theoretical/Conceptual	LM + Sust.	Social + Economic
195	Sustainable Purchasing in Food Retailing Interorganizational Relationship Management to Green Product Supply	2015	Chkanikova	Wiley Online	Europe	Food/Agriculture	LSCM + Sust.	Environmental + Social + Economic
196	Sustaining higher education using Wal-Mart’s best supply chain management practices	2008	Comm and Mathaisel(b)	Emerald Insight	USA	Service/Education	LSCM + Sust.	Economic
197	Synergizing an Ecosphere of Lean for Sustainable Operations	2014	Wong and Wong	Science Direct	Asia	Electronics	LM + Sust.	Social + Economic
198	Talented Suppliers? Strategic Change and Innovation in the UK Aerospace Industry	2005	Smith and Tranfield	Wiley Online	Europe	Aerospace/Aviation	LSCM + Sust.	Economic
199	The Adoption of High-Involvement Work Practices	1996	Pil and MacDuffie	Wiley Online	USA	Automotive	LM + Sust.	Social
200	The assessment of work organization in lean production: the relevance of the worker's perspective	2000	Biazzo and Panizzolo	Emerald Insight	Europe	Theoretical/Conceptual	LM + Sust.	Social
201	The Development of Green Logistics for Implementation Sustainable Development Strategy in Companies	2014	Seroka-Stolka	Science Direct	Europe	Theoretical/Conceptual	LSCM + Sust.	Environmental
202	The Effect of Organizational Culture on Implementing and Sustaining Lean Processes	2015	Pakdil and Leonard	Emerald Insight	Multi-Regional	Theoretical/Conceptual	LM + Sust.	Economic
203	The effects of lean production on worker job stress	2006	Conti et al.	Emerald Insight	Europe	Multi-Sectoral	LM + Sust.	Social
204	The human impact on supply chains: evaluating the importance of "soft" areas on integration and performance	2009	Shub and Stonebraker	Emerald Insight	USA	Theoretical/Conceptual	LSCM + Sust.	Social
205	The Impact of Lean Manufacturing on Environmental and Social Sustainability: A Study Using a Concept Mapping Approach	2013	Silva et al.	Science Direct	Europe	Other Manufacturing	LM + Sust.	Environmental + Social
206	The Impacts of Critical Success Factors for Implementing Green Supply Chain Management Towards Sustainability:An Empirical Investigation of Indian Automobile Industry	2016	Luthra et al.	Science Direct	Asia	Automotive	LSCM + Sust.	Environmental + Social + Economic
207	The Integration of Human Resource and Operation Management Practices and Its Link with Performance: A Longitudinal Latent Class Study	2010	Menezes et al.	Science Direct	Europe	Multi-Sectoral	LM + Sust.	Social
208	The Integration of Lean Manufacturing, Six Sigma and Sustainability: A Literature Review and Future Research Directions for Developing a Specific Model	2016	Cherrafi et al.	Science Direct	Multi-Regional	Literature Review	LM + Sust.	Environmental + Social + Economic
209	The Limits of Lean	1994	Cusumano	Other	USA	Automotive	LM + Sust.	Environmental
210	The missing arguments of lean construction	1999	Green	Taylor&Francis	Europe	Construction	LM + Sust.	Social
211	The Perspective of suppliers on lean supply in a developing country context	2001	Arkader	Emerald Insight	South America	Automotive	LSCM + Sust.	Economic
212	The Relationship Between Lean and Sustainable Manufacturing on Performance: Literature Review	2015	Hartini and Ciptomulyono	Science Direct	Asia	Literature Review	LM + Sust.	Environmental + Economic
213	The relationship Between Lean Operations and Sustainable Operations	2014	Piercy and Rich	Emerald Insight	Europe	Multi-Sectoral	LM + LSCM + Sust.	Environmental + Social + Economic
214	The Service Framework: A Public-service-dominant Approach to Sustainable Public Services	2015	Osborne et al.	Wiley Online	Europe	Service/Education	LM + Sust.	Economic
215	Tools and techniques for enabling sustainability through lean initiatives	2011	Vinodh et al.	Springer Link	Asia	Theoretical/Conceptual	LM + Sust.	Environmental + Social + Economic
216	Towards Eco-efficient Lean Production Systems	2010	Moreira et al.	Springer Link	Europe	Theoretical/Conceptual	LM + Sust.	Environmental
217	Trade-offs among Lean, Agile, Resilient, and Green Paradigms in Supply Chain Management: A Case Study Approach	2014	Carvalho et al.(c)	Springer Link	Europe	Automotive	LSCM + Sust.	Environmental + Economic
218	Two-Way Assessment of Barriers to Lean-Green Manufacturing System: Insights from India	2016	Mittal et al.	Springer Link	Asia	Theoretical/Conceptual	LM + Sust.	Environmental + Economic
219	Understanding the Impact of Green Operations on Organizational Financial Performance: An Industry Perspective	2014	Ngniatedema et al.	Wiley Online	Canada	Multi-Sectoral	LM + Sust.	Environmental + Economic
220	Use the supply relationship to develop lean and green suppliers.	2005	Simpson and Power	Emerald Insight	Ocenia	Automotive	LM + LSCM + Sust.	Environmental
221	Using Kaizen to Reduce Waste and Prevent Pollution	2002	Soltero and Waldrip	Wiley Online	USA	Theoretical/Conceptual	LM + Sust.	Environmental
222	Using Lean Techniques to Enable and Align the Workforce at Denver Health	2016	Fingado	Wiley Online	USA	HealthCare	LM + Sust.	Social
223	Does Lean Improve Labor Standards? Management and Social Performance in the Nike Supply Chain	2016	Distelhorst et al.	Other	Multi-Regional	Consumer Goods	LSCM + Sust.	Social
224	FRAMEWORK AND INDICATORS FOR A SUSTAINABLE MANUFACTURING MAPPING METHODOLOGY	2010	Paju et al.	Other	Europe	Theoretical/Conceptual	LM + LSCM + Sust.	Environmental + Social + Economic
225	Value chain analysis for green productivity improvement in the natural rubber supply chain: a case study	2014	Marimin et al.	Science Direct	Asia	Plastic/Rubber	LSCM + Sust.	Environmental + Economic
226	Sustainability — in light of competitiveness	2000	Sonntag	Science Direct	Europe	Literature Review	LM + Sust.	Environmental + Economic
227	'Green' value chain practices in the furniture industry	1997	Handfield et al.	Science Direct	USA	Wood Products	LM + Sust.	Environmental + Economic
228	Relational competence and strategic procurement management - Towards an entrepreneurial and contractual theory of the firm	1996	Cox	Science Direct	Europe	Theoretical/Conceptual	LM + LSCM + Sust.	Economic
229	Configurations of Manufacturing Strategy, Business Strategy, Environment and Structure	1996	Ward et al.	Science Direct	USA	Theoretical/Conceptual	LM + Sust.	Environmental + Economic
230	Lean, Agile and traditional supply: how do they impact manufacturing performance?	2004	Cagliano et al.	Science Direct	Europe	Other Manufacturing	LSCM + Sust.	Economic
231	An assessment of supply chain and innovation management practices in the manufacturing industries in Turkey	2003	Gunduz	Science Direct	Europe	Multi-Sectoral	LSCM + Sust.	Economic
232	GREENING THE VALUE STREAM: TOWARDS AN ENVIRONMENTAL INDEX	2006	Whitman et al.	Science Direct	USA	Theoretical/Conceptual	LM + Sust.	Environmental
233	Lean-integrated management system: A model for sustainability improvement	2018	Souza and Alves	Science Direct	South America	Theoretical/Conceptual	LM + Sust.	Environmental + Social + Economic
234	Integrating the environmental and social sustainability pillars into the lean and agile supply chain management paradigms: A literature review and future research directions	2018	Ciccullo et al.	Science Direct	Europe	Literature Review	LSCM + Sust.	Environmental + Social + Economic
235	Interactions of Building Information Modeling, Lean and Sustainability on the Architectural, Engineering and Construction industry: A systematic review	2018	Saieg	Science Direct	South America	Construction	LM + Sust.	Environmental + Economic
236	A lean and cleaner production benchmarking method for sustainability assessment: A study of manufacturing companies in Brazil	2018	Ramos et. Al	Science Direct	South America	Other Manufacturing	LM + Sust.	Environmental + Economic
237	Environmental benefits of lean, green and resilient supply chain management: The case of the aerospace sector	2017	Ruiz-Benitez et al.	Science Direct	Europe	Aerospace/Aviation	LSCM + Sust.	Environmental
238	Applying the green Embedded lean production model in developing countries: A case study of china	2017	Fu et al.	Science Direct	Asia	Food/Agriculture	LM + Sust.	Environmental + Economic
239	Incorporating lean thinking and life cycle assessment to reduce environmental impacts of plastic injection moulded products	2017	Cheung et al.	Science Direct	Europe	Plastic/Rubber	LM + Sust.	Environmental
240	Towards lean for sustainability: Understanding the interrelationships between lean and sustainability from a systems thinking perspective	2017	Martinez-Leon and Calvo-Amodio	Science Direct	USA	Literature Review	LM + Sust.	Environmental + Social + Economic
241	Examining the interaction between lean and sustainability principles in the management process of AEC industry	2016	Khodeir and Othman	Science Direct	USA	Construction	LM + Sust.	Environmental + Social + Economic
242	Integrating Lean Systems in the Design of a Sustainable Supply Chain Model	2018	Das	Science Direct	USA	Theoretical/Conceptual	LM + LSCM + Sust.	Environmental + Social + Economic
243	Lean-Green models for eco-efficient and sustainable production	2017	Abreu et al.	Science Direct	Europe	Literature Review	LM + LSCM + Sust.	Environmental + Social + Economic
244	Exploring the role of lean thinking in sustainable business practice: A systematic literature review	2017	Caldera and Dawes	Science Direct	Ocenia	Literature Review	LM + Sust.	Environmental + Economic
245	How much does Lean Manufacturing need environmental and information technologies?	2017	Sartal et al.	Science Direct	Europe	Multi-Sectoral	LM + Sust.	Environmental + Economic
246	Effect of lean tools to control external environment risks of construction projects	2017	Ansah and Sorooshian	Science Direct	Asia	Construction	LM + Sust.	Environmental
247	Improving first case start times using Lean in an academic medical center	2017	Deldar et al.	Science Direct	USA	HealthCare	LM + Sust.	Economic
248	Process innovation and environmental sustainability engagement: An application on technological firms	2018	Moyano-Fuentes et al.	Science Direct	Europe	Multi-Sectoral	LM + Sust.	Environmental + Economic
249	Modelling green and lean supply chains: An eco-efficiency perspective	2017	Carvalho et al.	Science Direct	Europe	Automotive	LSCM + Sust.	Environmental + Economic
250	Lean-based clean earthworks operation	2017	Belayutham et al.	Science Direct	Multi-Regional	Construction	LM + Sust.	Environmental + Economic
251	Impact of sustainability and manufacturing practices on supply chain performance: Findings from an emerging economy	2018	Katiyar et al.	Science Direct	Asia	Automotive	LM + LSCM + Sust.	Environmental + Social + Economic
252	Adoption of Integrated Lean-Green-Agile Strategies for Modern Manufacturing Systems	2017	Mittal et al.	Science Direct	Asia	Automotive	LM + Sust.	Environmental + Social + Economic
253	Sustainability index development for manufacturing industry	2017	Latif et al.	Science Direct	USA	Multi-Sectoral	LM + Sust.	Environmental + Social
254	Supply chain collaboration for sustainability: A literature review and future research agenda	2017	Chen et al.	Science Direct	Multi-Regional	Literature Review	LSCM + Sust.	Environmental + Social + Economic
255	Evolution of sustainability in supply chain management: A literature review	2017	Rajeev et al.	Science Direct	Multi-Regional	Literature Review	LSCM + Sust.	Environmental + Social + Economic
256	The Eco Lean method – A combined approach for low cost economic and ecologic optimization in the manufacturing industry	2016	Miehe et al.	Science Direct	Europe	Theoretical/Conceptual	LM + Sust.	Environmental + Economic
257	Systematic eco-innovation in Lean PSS environment: an integrated model	2016	Pacheco et al.	Science Direct	South America	Theoretical/Conceptual	LM + Sust.	Environmental + Economic
258	The Integration of Lean Construction and Sustainable Construction: A Stakeholder Perspective in Analyzing Sustainable Lean Construction Strategies in Malaysia	2016	Jamil and Fathi	Science Direct	Asia	Construction	LM + Sust.	Environmental + Economic
259	Sustainability performance indicators at shop floor level in large manufacturing companies	2017	Zackrisson et al.	Science Direct	Europe	Multi-Sectoral	LM + Sust.	Environmental + Social + Economic
260	TPS’s process design in American automotive plants and its effects on the triple bottom line and sustainability	2012	Bergenwall et al.	Science Direct	USA	Automotive	LM + Sust.	Environmental + Social + Economic
261	Ranking of drivers for integrated lean-green manufacturing for Indian manufacturing SMEs	2018	Gandhi et al.	Science Direct	Asia	Other Manufacturing	LM + Sust.	Environmental + Economic
262	Sustainable supply chain management: A case study of British Aerospace (BAe) Systems	2012	Gopalakrishnan et al.	Science Direct	Europe	Aerospace/Aviation	LSCM + Sust.	Environmental + Social + Economic
263	Sustainable value stream mapping (Sus-VSM) in different manufacturing system configurations: application case studies	2014	Brown et al.	Science Direct	USA	Multi-Sectoral	LM + LSCM + Sust.	Environmental + Social + Economic
264	Sustainable consumption and production for Asia: sustainability through green design and practice	2013	Tseng et al.	Science Direct	Asia	Theoretical/Conceptual	LSCM + Sust.	Environmental
265	Integration of management systems: towards a sustained success and development of organizations	2016	Rebelo et al.	Science Direct	Europe	Theoretical/Conceptual	LM + LSCM + Sust.	Environmental + Social + Economic
266	Analysis of greenhouse gas emissions in the road freight transportation using simulation	2018	Marcilio et al.	Science Direct	South America	Transportation/Cargo	LSCM + Sust.	Environmental
267	Integrating sustainability indicators and Lean Manufacturing to assess manufacturing processes: Application case studies in Brazilian industry	2016	Helleno et al.	Science Direct	South America	Multi-Sectoral	LM + Sust.	Environmental + Social + Economic
268	Efficiency & sustainability model to design and manage two-stage logistic networks	2017	Bortolini et al.	Science Direct	Europe	Other Manufacturing	LSCM + Sust.	Environmental
269	Systematic Review of the Application of Lean and Six Sigma Quality Improvement Methodologies in Radiology	2016	Amaratunga and Dobranowski	Science Direct	USA	HealthCare	LM + Sust.	Economic
270	Performance-Based Specifications for Sustainable Pavements: A Lean Engineering Analysis	2015	Hamdar et al.	Science Direct	Asia	Construction	LM + Sust.	Environmental + Social
271	Does lean management improve patient safety culture? An extensive evaluation of safety culture in a radiotherapy institute	2015	Simons et al.	Science Direct	Europe	HealthCare	LM + Sust.	Social
272	Lean Manufacturing and ergonomic working conditions in the automotive industry	2015	Santos et al.	Science Direct	South America	Automotive	LM + Sust.	Social
273	Lean thinking in the European hotel industry	2013	Vlachos abd Bogdanovic	Science Direct	Europe	Service/Education	LM + Sust.	Economic
274	Lean government and platform-based governance—Doing more with less	2013	Janssen and Estevez	Science Direct	Europe	Government	LM + Sust.	Economic
275	Outsourcing competitive advantage: the use of supplier associations	1998	Hines and Rich	Emerald Insight	Europe	Automotive	LSCM + Sust.	Economic
276	Time-Cost-Quality Leadership - New Ways to Gain A Sustainable Competitive Advantage in Retailing	1993	Maximov and Gottschlich	Emerald Insight	Europe	Retail	LM + Sust.	Economic
277	Logistics management at the threshold of the new millennium	1998	Pollitt	Emerald Insight	Multi-Regional	Theoretical/Conceptual	LSCM + Sust.	Economic
278	The evolution of lean Six Sigma	2010	Pepper and Spedding	Emerald Insight	Ocenia	Literature Review	LM + LSCM + Sust.	Economic
279	Integrated production machines and systems – beyond lean manufacturing	2008	Pham and Pham	Emerald Insight	Asia	Foundry/Casting/Molding	LM + Sust.	Economic
280	Creating flex-lean-agile value chain by outsourcing An ISM-based interventional roadmap	2008	Mohammed et al.	Emerald Insight	Multi-Regional	Theoretical/Conceptual	LSCM + Sust.	Economic
281	Can lean save lives?	2007	Fillingham	Emerald Insight	Europe	HealthCare	LM + Sust.	Social + Economic
282	Creating an enterprise-level ‘‘green’’ strategy	2008	Olson	Emerald Insight	USA	Theoretical/Conceptual	LM + Sust.	Environmental + Economic
283	"Life" is Our Ultimate Customer: From Lean to Sustainability	2006	Langenwalter	Other	USA	Theoretical/Conceptual	LM + Sust.	Environmental + Economic
284	Development of lean supply chains: a case study of the Catalan pork sector	2010	Perez et al.	Emerald Insight	Europe	Food/Agriculture	LSCM + Sust.	Economic
285	Workers’ experiences of skill, training and participation in lean and high performance workplaces in Britain and Italy	2010	Stwwart et al.	Emerald Insight	Europe	Multi-Sectoral	LM + Sust.	Social
286	Towards sustainable construction: promotion and best practices	2009	Pitt et al.	Emerald Insight	Europe	Construction	LM + Sust.	Environmental + Social + Economic
287	Complexity and the triple bottom line: an information-processing perspective	2017	Wiengarten et al.	Emerald Insight	Multi-Regional	Multi-Sectoral	LM + Sust.	Environmental + Social + Economic
288	Lean manufacturing practices in Indian manufacturing SMEs and their effect on sustainability performance	2017	Sajan et al.	Emerald Insight	Asia	Automotive	LM + Sust.	Environmental + Social + Economic
289	Could lean and green be the driver to integrate business improvement throughout the organisation?	2018	Chaplin and O'Rourke	Emerald Insight	Europe	Theoretical/Conceptual	LM + Sust.	Environmental + Social + Economic
290	The effect of lean production on financial performance: The mediating role of inventory leanness	2012	Hofer et al.	Science Direct	USA	Other Manufacturing	LM + Sust.	Economic
291	Identifying the characteristics for achieving sustainable manufacturing companies	2012	Thomas et al.	Emerald Insight	Europe	Musical Instruments	LM + Sust.	Economic
292	Modeling and performance evaluation of agility coupled with sustainability for business planning	2017	Singh and Vinodh	Emerald Insight	Asia	Theoretical/Conceptual	LM + Sust.	Environmental + Social + Economic
293	World class sustainable supply chain management: critical review and further research directions	2017	Dubey et al.	Emerald Insight	Multi-Regional	Literature Review	LSCM + Sust.	Environmental + Social + Economic
294	The maturity of supply chain sustainability disclosure from a continuous improvement perspective	2013	Okongwu et al.	Emerald Insight	Europe	Multi-Sectoral	LSCM + Sust.	Environmental + Social + Economic
295	Strategic Lean Actions for Sustainable Competitive Advantage	2017	Hallam et al.	Emerald Insight	South America	Literature Review	LM + Sust.	Economic
296	Lean supply chain performance measurement	2014	Arif-Uz-Zaman and Ahsan	Emerald Insight	Asia	Theoretical/Conceptual	LSCM + Sust.	Economic
297	First evidences from “lean & safety” projects	2015	Verbano and Chiozza	Emerald Insight	Europe	Service/Education	LM + Sust.	Social
298	Sustainable supply chain management practices and performance	2018	Wang and Dai	Emerald Insight	Asia	Theoretical/Conceptual	LM + LSCM + Sust.	Environmental + Social + Economic
299	Life cycle assessment integrated value stream mapping framework to ensure sustainable manufacturing: a case study	2016	Vinodh et al.	Springer Link	Asia	Automotive	LM + Sust.	Environmental + Social + Economic
300	Sustainable supply chain management: a modeling perspective	2015	Brandenburg and Rebs	Springer Link	Europe	Literature Review	LSCM + Sust.	Environmental + Social + Economic
301	A Lean PSS design and evaluation framework supported by KPI monitoring and context sensitivity tools	2018	Mourtzis et al.	Springer Link	Europe	Foundry/Casting/Molding	LM + Sust.	Environmental + Economic
302	An empirical validation of integrated manufacturing business excellence model	2017	Paranitharan et al.	Springer Link	Asia	Multi-Sectoral	LM + Sust.	Environmental + Social + Economic
303	A Lean Life Cycle Framework for Assessing Product Sustainability	2014	Egbue et al.	Other	USA	Automotive	LM + Sust.	Environmental + Economic
304	Lean Six Sigma with environmental focus: review and framework	2017	Ben Ruben et al.	Springer Link	Asia	Theoretical/Conceptual	LM + Sust.	Environmental + Economic
305	Strategy selection for sustainable manufacturing with integrated AHP-VIKOR method under interval-valued fuzzy environment	2016	Singh et al.	Springer Link	Asia	Theoretical/Conceptual	LM + Sust.	Environmental + Social + Economic
306	Implementation of Lean and Green practices: a supplier-oriented assessment method	2017	Sant'Anna et al.	Springer Link	South America	Theoretical/Conceptual	LSCM + Sust.	Environmental + Economic
307	Applying lean manufacturing system to improving productivity of airconditioning coil manufacturing	2014	Das et al.	Springer Link	Canada	Other Manufacturing	LM + Sust.	Social + Economic
308	Lean manufacturing implementation: an assessment method with regards to socio-technical and ergonomics practices adoption	2017	Tortorella et al.	Springer Link	South America	Automotive	LM + Sust.	Social
309	Manufacturing wastes analysis in lean environment: an integrated ISM-fuzzy MICMAC approach	2017	Patidar et al.	Springer Link	Asia	Other Manufacturing	LM + Sust.	Economic
310	Targeting sustainable competitiveness in Croatia by implementation of “20 Keys” methodology	2016	Dabic et al.	Springer Link	Europe	Multi-Sectoral	LM + Sust.	Economic
311	Supply Chain Strategies and Carbon Intensity: The Roles of Process Leanness, Diversification Strategy, and Outsourcing	2017	Chen	Springer Link	Asia	Other Manufacturing	LSCM + Sust.	Environmental + Economic
312	The impact of Kaizen on safety in modular home manufacturing	2014	James et al.	Springer Link	USA	Construction	LM + Sust.	Social
313	Implementation of lean production and environmental sustainability in the Indian apparel manufacturing industry: a way to reach the triple bottom line	2017	Raj et al.	Taylor&Francis	Asia	Consumer Goods	LM + Sust.	Environmental + Economic
314	A framework for the integration of Green and Lean Six Sigma for superior sustainability performance	2017	Cherrafi et al.	Taylor&Francis	Multi-Regional	Multi-Sectoral	LM + Sust.	Environmental + Social + Economic
315	Performance evaluation of lean sustainable systems using adaptive neuro fuzzy inference system: a case study	2017	Ben Ruben et al.	Taylor&Francis	Asia	Automotive	LM + Sust.	Environmental + Social + Economic
316	Lean six sigma and environmental sustainability: a hospital perspective	2018	Zhu et al.	Taylor&Francis	USA	HealthCare	LSCM + Sust.	Environmental + Economic
317	Sustainability of process improvements: an application of the experiential learning model (ELM)	2017	Chakravorty and Hales	Taylor&Francis	USA	Aerospace/Aviation	LM + Sust.	Economic
318	A framework for measuring sustainability in healthcare systems	2017	AlJaberi et al.	Taylor&Francis	Middle East	HealthCare	LM + Sust.	Environmental + Social + Economic
319	AUTOMOTIVE ENTERPRISE TRANSFORMATION: BUILD TO ORDER AS A SUSTAINABLE AND INNOVATIVE STRATEGY FOR THE AUTOMOTIVE INDUSTRY?	2013	Parry and Roehrich	Taylor&Francis	Europe	Automotive	LM + Sust.	Environmental + Economic
320	Modelling and analysis of sustainable manufacturing system using a digraph-based approach	2017	Vimal et al.	Taylor&Francis	Asia	Theoretical/Conceptual	LM + Sust.	Environmental + Social + Economic
321	Trade-offs in lean vs. outsourced supply chains	2016	Swenseth and Olson	Taylor&Francis	USA	Theoretical/Conceptual	LSCM + Sust.	Economic
322	Environmental sustainability and production: taking the road less travelled	2017	Sarkis and Zhu	Taylor&Francis	USA	Literature Review	LM + LSCM + Sust.	Environmental + Social + Economic
323	World-class sustainable manufacturing: framework and a performance measurement system	2015	Dubey et al.	Taylor&Francis	Multi-Regional	Theoretical/Conceptual	LM + LSCM + Sust.	Environmental + Social + Economic
324	A green supply chain is a requirement for profitability	2012	Kumar et al.	Taylor&Francis	USA	Multi-Sectoral	LSCM + Sust.	Environmental + Economic
325	Sustainable Operations Management	2005	Kleindorfer et al.	Wiley Online	USA	Literature Review	LSCM + Sust.	Environmental + Social + Economic
326	Trends and Future Directions in Sustainable Development	2017	Wichaisri and Sopadang	Wiley Online	Asia	Literature Review	LSCM + Sust.	Environmental + Social + Economic
327	A Systematic Literature Review on Recent Lean Research: State-of-the-art and Future Directions	2017	Danese et al.	Wiley Online	Europe	Literature Review	LM + LSCM + Sust.	Environmental + Social + Economic
328	Reporting on the Triple Bottom Line at Cascade Engineering	2007	Douglas	Wiley Online	USA	Plastic/Rubber	LM + Sust.	Environmental + Social + Economic
329	The Economic Value of a Sustainable Supply Chain	2011	Mefford	Wiley Online	USA	Theoretical/Conceptual	LSCM + Sust.	Environmental + Social + Economic
330	Aligning responsible business practices: A case study	2016	Weller	Wiley Online	USA	High Tech	LM + Sust.	Environmental + Social + Economic
331	Sustained lean transformation of working conditions: A Swedish longitudinal case study	2017	Hakansson et al.	Wiley Online	Europe	Metal	LM + Sust.	Social + Economic
332	Quality Toolbox: Five S's: A Tool That Prepares an Organization for Change	1999	Pojasek	Wiley Online	USA	Theoretical/Conceptual	LM + Sust.	Environmental + Social
333	Quality Toolbox: Poka-Yoke and Zero Waste	1999	Pojasek	Wiley Online	USA	Theoretical/Conceptual	LM + Sust.	Environmental
334	Lean and green supply chain mapping: adapting a lean management tool to the needs of industrial ecology	2008	Mason et al.	Other	Europe	Theoretical/Conceptual	LSCM + Sust.	Environmental + Economic
335	Lean, Green and Safe: Integrating Safety into the Lean, Green and Sustainability Movement.	2010	Taubitz	Other	USA	Theoretical/Conceptual	LM + Sust.	Environmental + Social + Economic
336	Lean and Green: Doing More With Less	2003	Simons and Mason	Other	Europe	Theoretical/Conceptual	LSCM + Sust.	Environmental + Economic
337	Just-in-Time Manufacturing and Pollution Prevention Generate Mutual Benefits in the Furniture Industry	2000	Klassen	Other	Canada	Wood Products	LM + Sust.	Environmental + Economic
338	The relationship between ISO 14001 and continuous source reduction programs	2000	Kitazawa and Sarkis	Emerald Insight	USA	Multi-Sectoral	LM + Sust.	Environmental + Social
339	A multiple attribute utility theory approach to lean and green supply chain management	2006	Kainuma and Tawara	Science Direct	Asia	Theoretical/Conceptual	LSCM + Sust.	Environmental + Economic
340	ENVIRONMENTAL PERFORMANCE AS A DRIVER OF SUPERIOR QUALITY*	2003	Pil and Rothenberg	Wiley Online	USA	Automotive	LM + Sust.	Environmental + Economic
341	Relationships between operational practices and performance among early adopters of green supply chain management practices in Chinese manufacturing enterprises	2004	Zhu and Sarkis	Science Direct	Asia	Multi-Sectoral	LSCM + Sust.	Environmental + Economic
342	Mediated effect of environmental management on manufacturing competitiveness: An empirical study	2010	Yang et al.	Science Direct	Multi-Regional	Multi-Sectoral	LM + LSCM + Sust.	Environmental + Economic
343	A case study of lean, sustainable manufacturing	2010	Miller et al.	Other	USA	Wood Products	LM + Sust.	Environmental + Economic
344	Lean to Green Supply Chain Management: A Case Study	2012	Jasti et al.	Other	Asia	Metal	LSCM + Sust.	Environmental + Economic
345	An empirical study on the contribution of lean practices to environmental performance of the manufacturing firms in northern region of Malaysia	2012	Bandeh Nezhad et al.	Other	Asia	Other Manufacturing	LM + Sust.	Environmental
346	Sustainable Lean Six-sigma Green Engineering System Design Educational Challenges and Interactive Multimedia Solutions	2012	Ranky et al.	Other	Multi-Regional	Service/Education	LM + Sust.	Environmental
347	Choosing the right green marketing strategy: green marketing has not fulfilled its initial promise, but companies can take a more effective approach if they realize that a one-size-fits-all strategy does not exist	2004	Ginsberg and Bloom	Other	USA	Theoretical/Conceptual	LM + Sust.	Environmental
348	Lean Processes for Sustainable Project Delivery	2006	Lapinski et al.	Other	USA	Construction	LM + Sust.	Environmental + Economic
349	Sustainable Work Environment with Lean Production in Textile and Clothing Industry	2013	Maia et al.	Other	Europe	Consumer Goods	LM + Sust.	Environmental + Economic
350	Identification of non-value adding (NVA) activities in precast concrete installation sites to achieve low-carbon installation	2013	Wu et al.	Science Direct	Asia	Construction	LM + Sust.	Environmental
351	The relationship between continuous improvement and rapid improvement sustainability	2015	Glover et al.	Taylor&Francis	USA	Multi-Sectoral	LM + Sust.	Economic
352	Sustainable Domain Value Stream Mapping (SdVSM) Framework Application in Aircraft Maintenance: A Case Study	2015	Kasava et al.	Science Direct	Asia	Aerospace/Aviation	LM + Sust.	Environmental + Social + Economic
353	A simulation-based framework for improving the ecological and economic transparency in multi-variant production	2015	Kruse et al.	Science Direct	Europe	Theoretical/Conceptual	LM + Sust.	Environmental + Economic
354	More sustainable automotive production through understanding decoupling points in leagile manufacturing	2015	Nieuwenhuis and Katsifou	Science Direct	Europe	Automotive	LM + Sust.	Environmental + Economic
355	Modelling, assessment and deployment of strategies for ensuring sustainable shielded metal arc welding process e a case study	2015	Vimal et al.	Science Direct	Asia	Metal	LM + Sust.	Environmental + Economic
356	ASSESSMENT OF THE LEAN PRODUCTION EFFECT ON THE SUSTAINABLE INDUSTRIAL ENTERPRISE DEVELOPMENT	2007	Dakov and Novkov	Other	Europe	Theoretical/Conceptual	LM + Sust.	Environmental + Social + Economic
357	Is Lean Necessarily Green?	2006	Venkat and Wakeland	Other	USA	Automotive	LSCM + Sust.	Environmental
358	The impact of Six Sigma in the performance of a Pollution Prevention program	2009	Calia et al.	Science Direct	South America	Multi-Sectoral	LM + Sust.	Environmental + Economic
359	FROM LEAN TO GREEN CONSTRUCTION: A NATURAL EXTENSION	2009	Nahmens	Other	USA	Construction	LM + Sust.	Environmental
360	THE DEVELOPMENT OF GREEN ENVIRONMENT THROUGH LEAN IMPLEMENTATION IN A GARMENT INDUSTRY	2011	Marudhamuthu and Krishnaswamy	Other	Asia	Consumer Goods	LM + Sust.	Environmental
361	Production planning of multi-stage multi-option seru production systems with sustainable measures	2015	Liu et al.	Science Direct	Asia	Theoretical/Conceptual	LM + Sust.	Environmental + Economic
362	Lean Manufacturing for Sustainable Development	2010	Upadhye et al.	Other	Asia	Literature Review	LM + Sust.	Economic
363	Quality Green, EMS and lean synergies: sustainable manufacturing within SMEs as a case point	2014	Wadhwa	Other	Europe	Literature Review	LM + Sust.	Environmental + Economic
364	Critical success factors for human resource outcomes in Kaizen events: An empirical study	2009	Farris et al.	Science Direct	USA	Multi-Sectoral	LM + Sust.	Social
365	The impact of lean operations on the Chinese manufacturing performance	2011	Taj and Morosan	Science Direct	Asia	Multi-Sectoral	LM + Sust.	Economic
366	Environmental proactivity and business performance: an empirical analysis	2005	Gonzalez-Benito and Gonzalez-Benito	Science Direct	Europe	Multi-Sectoral	LM + Sust.	Environmental + Economic
367	The unique and complementary effects of manufacturing technologies and lean practices on manufacturing operational performance	2014	Khanchanapong et al.	Science Direct	Asia	Multi-Sectoral	LM + Sust.	Economic
368	SUSTAINABLE VALUE ON CONSTRUCTION PROJECT AND APPLICATION OF LEAN CONSTRUCTION METHODS	2007	Bae and Kim	Other	USA	Construction	LM + Sust.	Environmental + Social + Economic
369	Using lean methodologies for economically and environmentally sustainable foundries	2011	Torielli et al.	Other	Asia	Metal	LM + Sust.	Environmental + Economic
370	Lean Construction and Sustainability - Complementary Paradigms? A Case St	2011	Vieria and Cachadinha	Other	Europe	Construction	LM + Sust.	Environmental + Social + Economic
371	GREEN-LEAN APPROACH FOR ASSESSING ENVIRONMENTAL AND PRODUCTION WASTE IN CONSTRUCTION	2012	Rosenbaum et al.	Other	South America	Construction	LM + Sust.	Environmental + Economic
372	When does lean hurt? – an exploration of lean practices and worker health and safety outcomes	2013	Longoni et al.	Taylor&Francis	USA	Multi-Sectoral	LM + Sust.	Social
373	Composite Practices to Improve Sustainability: A Framework and Evidence from Chinese Auto-parts Company	2013	Wang et al.	Other	Asia	Automotive	LM + Sust.	Environmental + Social + Economic
374	Lean Environmental Management Integration System for Sustainability of ISO 14001:2004 standard implementation	2014	Puvanasvaran et al.	Other	Asia	Theoretical/Conceptual	LM + Sust.	Environmental
375	Overall Environmental Equipment Effectiveness as a Metric of a Lean and Green Manufacturing System	2015	Domingo and Aguado	Other	Europe	Metal	LM + Sust.	Environmental + Economic
376	Energy Value-Stream Mapping a Method to Visualize Waste of Time and Energy	2015	Schillig et al.	Springer Link	Europe	Metal	LM + Sust.	Environmental + Economic
377	Supply chain practices and organizational performance An empirical investigation of Indian manufacturing organizations	2017	Gorane and Kant	Emerald Insight	Asia	Multi-Sectoral	LSCM + Sust.	Economic
378	Using interpretive structure modeling to analyze the interactions between environmental sustainability boundary enablers	2016	Dev and Shankar	Emerald Insight	Asia	Theoretical/Conceptual	LSCM + Sust.	Environmental + Economic
379	Green and lean implementation: an assessment in the automotive industry	2017	Duarte and Cruz Machado	Emerald Insight	Europe	Automotive	LM + Sust.	Environmental + Social + Economic
380	Lean Six Sigma and environmental sustainability: the case of a Norwegian dairy producer	2017	Powell et al.	Emerald Insight	Europe	Food/Agriculture	LM + Sust.	Environmental
381	Integration of Eco-Efficiency and Efficiency Assessment Methodologies: The Efficiency Framework	2017	Baptista et al.	Springer Link	Europe	Theoretical/Conceptual	LM + Sust.	Environmental + Economic
382	A Review of Lean Assessment in Organizations: An Exploratory Study of Lean Practices by Electronics Manufacturers	2005	Doolen and Hacker	Science Direct	USA	Electronics	LM + Sust.	Economic
383	Is green and profitable sustainable? Assessing the trade-off between economic and environmental aspects	2012	Figge and Hahn	Science Direct	Multi-Regional	Automotive	LM + Sust.	Environmental + Economic
384	Impact of supply chain management practices on sustainability	2014	Govindan et al.	Science Direct	Europe	Theoretical/Conceptual	LSCM + Sust.	Environmental + Social + Economic
385	A Practical and Theoretical Approach to Sustainability Using Process Improvement	2011	Harris et al.	Other	USA	Automotive	LM + Sust.	Environmental + Economic
386	Waste flow mapping to improve sustainability of waste management: a case study approach	2015	Kurdve et al.	Science Direct	Europe	Automotive	LM + Sust.	Environmental + Economic
387	How Does Sustainable Development of Supply Chains Make Firms Lean, Green and Proﬁtable? A Resource Orchestration Perspective	2017	Wong et al.	Wiley Online	Asia	Multi-Sectoral	LM + LSCM + Sust.	Environmental + Economic
388	Fit manufacturing: a framework for sustainability	2012	Pham and Thomas	Emerald Insight	Multi-Regional	Multi-Sectoral	LM + LSCM + Sust.	Economic
389	Improving Environmental and Production Performance in Construction Projects Using Value-Stream Mapping: Case Study	2014	Rosenbaum et al.	Other	South America	Construction	LM + Sust.	Environmental + Economic
390	A simulation-based decision support for eco-efficiency improvements in production systems	2015	Sproedt et al.	Science Direct	Europe	Multi-Sectoral	LM + Sust.	Environmental + Economic
391	Analytic Hierarchy Process (AHP) Model for Evaluating Sustainable Manufacturing Practices in Indian Electrical Panel Industries	2015	Gupta et al.	Science Direct	Asia	Electronics	LM + Sust.	Environmental + Economic
392	Conception of a flexible integrator and lean model for integrated management systems	2014	Rebelo et al.	Taylor&Francis	Europe	Theoretical/Conceptual	LM + Sust.	Environmental + Social + Economic
393	Lean construction implementation and its implication on sustainability: a contractor’s case study	2011	Song and Liang	Other	USA	Construction	LM + Sust.	Environmental + Economic
394	INTEGRATION OF GREEN THINKING INTO LEAN FUNDAMENTALS BY THEORY OF INVENTIVE PROBLEMS-SOLVING TOOLS	2012	Bashkite and Karaulova	Other	Europe	Theoretical/Conceptual	LM + Sust.	Environmental + Economic
395	Expanding Lean Thinking to the Product and Process Design and Development within the Framework of Sustainability	2012	Sorli et al.	Other	Europe	Multi-Sectoral	LM + Sust.	Environmental + Social + Economic
396	Sustainable manufacturing: trends and research challenges	2012	Garetti and Taisch	Taylor&Francis	Europe	Theoretical/Conceptual	LM + Sust.	Environmental + Social + Economic
397	Changing Organizational Space: Green? Or Lean and Mean?	2012	Leonard	Other	Europe	Multi-Sectoral	LM + Sust.	Environmental + Social
398	TRANSITIONING TO A LEAN PARADIGM: A MODEL FOR SUSTAINABILITY IN THE LEASING AND RENTAL INDUSTRIES	2013	Seay and Narsing	Other	USA	Leasing	LM + Sust.	Economic
399	Green Lean Six Sigma and Financial Performance in Malaysian Automotive Industry	2013	Zamri et al.	Other	Asia	Automotive	LM + Sust.	Environmental + Economic
400	A literature and practice review to develop sustainable business model archetypes	2014	Bocken et al.	Science Direct	Europe	Literature Review	LM + Sust.	Environmental + Social + Economic
401	Green Sustainability and New Social Media	2014	Williams et al.	Other	USA	Theoretical/Conceptual	LM + Sust.	Environmental
402	Green-Lean Synergy - Root-Cause Analysis in Food Waste Prevention	2015	Amani et al.	Other	Europe	Food/Agriculture	LM + Sust.	Environmental + Economic
403	Applicability of SIRIM Green 5-S Model for productivity & business growth in Malaysia	2015	Ho et al.	Emerald Insight	Asia	Multi-Sectoral	LM + Sust.	Environmental + Economic
404	Sustainable supply management: An empirical study	2012	Ageron et al.	Science Direct	Europe	Multi-Sectoral	LSCM + Sust.	Environmental + Social + Economic
405	Management Systems and Good Practices Related to the Sustainable Supply Chain Management	2014	Ching and Moreira	Other	South America	Literature Review	LSCM + Sust.	Environmental + Economic
406	The impact of lean methods and tools on the operational performance of manufacturing organisations	2014	Belekoukias et al.	Taylor&Francis	Europe	Other Manufacturing	LM + Sust.	Economic
407	Hybrid two-stage planning for food industry overproduction waste minimization	2007	Darlington and Rahimifard	Taylor&Francis	Europe	Food/Agriculture	LM + Sust.	Environmental + Economic
408	Sustainable production: The ultimate result of a continuous improvement	1998	de Ron	Science Direct	Europe	Theoretical/Conceptual	LM + Sust.	Environmental + Economic
409	Assessing the impact of cost optimization based on infrastructure modelling on CO2 emissions	2011	Harris et al.	Science Direct	Europe	Automotive	LSCM + Sust.	Environmental + Economic
410	An economic and environmental framework for analyzing globally sourced auto parts packaging system	2008	Lai et al.	Science Direct	USA	Automotive	LSCM + Sust.	Environmental + Economic
411	Operational methods for minimization of energy consumption of manufacturing equipment	2007	Mouzon et al.	Science Direct	USA	Theoretical/Conceptual	LM + Sust.	Environmental + Economic
412	Steps towards sustainable manufacturing through modelling material, energy and waste flows	2012	Smith and Ball	Science Direct	Europe	High Tech	LM + Sust.	Environmental + Economic
413	Beyond competition: A framework for the 21st century	2000	Ahmed and Abdalla	Taylor&Francis	Europe	Theoretical/Conceptual	LM + Sust.	Economic
414	THE CONCEPTUAL FRAMEWORK OF LEAN SUSTAINABLE LOGISTICS	2014	Sopadang et al.	Other	Asia	Theoretical/Conceptual	LSCM + Sust.	Environmental + Social + Economic
415	A conceptual sustainable domain value stream mapping framework for manufacturing	2013	Yusof et al.	Other	Asia	Theoretical/Conceptual	LM + Sust.	Environmental + Social + Economic
416	Environmentally Lean Production: The Development and Incorporation of an Environmental Impact Index into Value Stream Mapping	2013	Roosen and Pons	Other	Ocenia	Theoretical/Conceptual	LM + Sust.	Environmental
417	A carbon emission analysis model for electronics manufacturing process based on value-stream mapping and sensitivity analysis	2012	Li et al.	Taylor&Francis	Asia	Electronics	LM + Sust.	Environmental
418	A method to generate energy value-streams in production and logistics in respect of time- and energy-consumption	2014	Muller et al.	Springer Link	Europe	Electronics	LM + LSCM + Sust.	Environmental + Economic
419	Does lean manufacturing improve firm value?	2017	Zhu and Lin	Emerald Insight	Asia	Other Manufacturing	LM + Sust.	Economic
420	A fuzzy goal programming approach for selecting sustainable suppliers	2017	Pandey et al.	Emerald Insight	Asia	Automotive	LSCM + Sust.	Economic
421	EMPIRICAL INVESTIGATION OF CONTRIBUTIONS OF 5S PRACTICE FOR REALIZING IMPROVED COMPETITIVE DIMENSIONS	2017	Randhawa and Ahuja	Emerald Insight	Asia	Other Manufacturing	LM + Sust.	Social + Economic
422	Assessing the impact of eco-innovations through sustainability indicators: the case of the commercial tea plantation industry in Sri Lanka	2017	Gunarathne and Peiris	Springer Link	Asia	Food/Agriculture	LM + Sust.	Environmental + Social + Economic
423	Analysis of Relationship Between Manufacturing Flexibility and Lean Manufacturing Using Structural Equation Modelling	2017	Solke and Singh	Springer Link	Asia	Automotive	LM + Sust.	Economic
424	Total productive maintenance (TPM) as a tool for improving productivity: a case study of application in the bottleneck of an auto-parts machining line	2017	Mendez and Rodriguez	Springer Link	South America	Automotive	LM + Sust.	Economic
425	Healthcare Quality Improvement and ‘work engagement’; concluding results from a national, longitudinal, cross-sectional study of the ‘Productive Ward-Releasing Time to Care’ Programme	2017	White et al.	Springer Link	Europe	HealthCare	LM + Sust.	Social
426	Green and Lean Model for Business Sustainability	2017	Duarte and Cruz-Machado	Springer Link	Europe	Theoretical/Conceptual	LM + Sust.	Environmental + Social + Economic
427	Implementing Total Lifecycle Product Sustainability Through True Lean Thinking	2017	Maginnis et al.	Springer Link	USA	Theoretical/Conceptual	LM + Sust.	Environmental + Social + Economic
428	Establishing a Link Between Lean Practices and Corporate Sustainability	2017	Silva and Vaz	Springer Link	Europe	Other Manufacturing	LM + Sust.	Environmental + Economic
429	Supply Chain Sustainability in Spanish Major Retailer Through Strategic Alliances and Lean Practices	2017	Morcillo-Bellido and Duran	Springer Link	Europe	Retail	LSCM + Sust.	Economic
430	Eco Orbit View – A Way to Improve Environmental Performance with the Application of Lean Management	2017	Skornowicz et al.	Springer Link	Europe	Other Manufacturing	LM + Sust.	Environmental + Economic
431	Frugal and Lean Engineering: A Critical Comparison and Implications for Logistics Processe	2017	Rosca and Bendul	Springer Link	Europe	Theoretical/Conceptual	LM + LSCM + Sust.	Economic
432	Lean Manufacturing and Environmental Performance – Exploring the Impact and Relationship	2017	Nadeem et al.	Springer Link	Multi-Regional	Theoretical/Conceptual	LM + Sust.	Environmental + Economic
433	Exploring Linkages Between Lean and Green Supply Chain and the Industry 4.0	2017	Duarte and Cruz-Machado	Springer Link	Europe	Theoretical/Conceptual	LSCM + Sust.	Environmental + Economic
434	Multi-Layer Stream Mapping: Application to an Injection Moulding Production System	2017	Gomes et al.	Springer Link	Europe	Plastic/Rubber	LM + Sust.	Environmental + Economic
435	A Manufacturing Value Modeling Methodology (MVMM): A Value Mapping and Assessment Framework for Sustainable Manufacturing	2017	Demartini et al.	Springer Link	Europe	Theoretical/Conceptual	LM + Sust.	Environmental + Social + Economic
436	Toward Industry 4.0: Efficient and Sustainable Manufacturing Leveraging MAESTRI Total Efficiency Framework	2017	Ferrera et al.	Springer Link	Europe	Theoretical/Conceptual	LM + Sust.	Environmental + Social + Economic
437	Barriers and strategies applying Cleaner Production: a systematic review	2016	Vieria and Amaral	Science Direct	Multi-Regional	Literature Review	LM + Sust.	Environmental
438	Development of a Holistic Method to Analyse the Consumption of Energy and Technical Services in Manufacturing Facilities	2017	Cosgrove et al.	Springer Link	Europe	Multi-Sectoral	LM + Sust.	Environmental + Economic
439	Ergonomic Value Stream Mapping: A Novel Approach to Reduce Subjective Mental Workload	2017	Arce et al.	Springer Link	Mexico	Electronics	LM + Sust.	Social
440	A Decision Support System for Optimizing the Last-Mile by Mixing Traditional and Green Logistics	2017	Perboli and Rosano	Springer Link	Europe	Transportation/Cargo	LSCM + Sust.	Economic
441	Lean practices and their effect on performance: a literature review	2017	Negrao et al.	Taylor&Francis	Multi-Regional	Literature Review	LM + Sust.	Environmental + Economic
442	Creating and Capturing Value Through Sustainability	2017	Yang et al.	Taylor&Francis	Asia	Multi-Sectoral	LM + LSCM + Sust.	Environmental + Social + Economic
443	Lean implementation in a service factory: views from the front-line	2017	Smith et al.	Taylor&Francis	Europe	Service/Education	LM + Sust.	Social + Economic
444	End-of-life aircraft treatment in the context of sustainable development, lean management, and global business	2017	Keivanpour et al.	Taylor&Francis	Canada	Aerospace/Aviation	LM + LSCM + Sust.	Environmental + Social + Economic
445	Improving road transport operations through lean thinking: a case study	2017	Villarreal et al.	Taylor&Francis	Mexico	Transportation/Cargo	LSCM + Sust.	Economic
446	Work intensification and employee involvement in leanproduction: new light on a classic dilemma	2018	Neirotti	Taylor&Francis	Europe	Automotive	LM + Sust.	Social
447	Lean and green supply chain management through intermodal transport: insights from the fast moving consumer goods industry	2017	Colicchia et al.	Taylor&Francis	Europe	Consumer Goods	LSCM + Sust.	Environmental + Economic
448	Implementation of Lean Six Sigma framework with environmental considerations in an Indian automotive component manufacturing firm: a case study	2017	Ben Ruben et al.	Taylor&Francis	Asia	Automotive	LM + Sust.	Environmental + Economic
449	A lean environmental benchmarking (LEB) method for the management of cutting tools	2017	Tomelero et al.	Taylor&Francis	South America	Metal	LM + Sust.	Environmental + Economic
450	Lean manufacturing practices, ISO 14001, and environmental performance in Malaysian automotive suppliers	2018	Habidin et al.	Taylor&Francis	Asia	Automotive	LM + Sust.	Environmental
451	Job crafting for lean engagement: The interplay of day and job-level characteristics	2017	Cullinane et al.	Taylor&Francis	Europe	Pharmaceuticals	LM + Sust.	Social
452	Proposing an integrated LCA-SCM model to evaluate the sustainability of customisation strategies	2017	Fornasiero et al.	Taylor&Francis	Europe	Leather	LSCM + Sust.	Environmental
453	Short-Term Physiological Strain and Recovery among Employees Working with Agile and Lean Methods in Software and Embedded ICT Systems	2017	Tuomivaara et al.	Taylor&Francis	Europe	Software	LM + Sust.	Social
454	A preliminary study on the regenerative construction project management concept for enhancing sustainability performance of the construction industry	2017	Sertyesilisik	Taylor&Francis	Europe	Construction	LM + Sust.	Environmental
455	Dematerialisation of products and manufacturinggenerated knowledge content: relationship through paradigms	2017	Petrides et al.	Taylor&Francis	Europe	Multi-Sectoral	LM + Sust.	Environmental + Economic
456	Developments of traditional value stream mapping to enhance personal and organisational system and methods competencies	2017	Sunk et al.	Taylor&Francis	Europe	Automotive	LM + Sust.	Environmental + Social + Economic
457	The prevalence of service excellence and the use of business process improvement methodologies in Australian universities	2017	Ciancio	Taylor&Francis	Ocenia	Service/Education	LM + Sust.	Economic
458	Achieving business excellence through selfassessment for personal and professional excellence	2017	Jaeger	Taylor&Francis	Europe	Multi-Sectoral	LM + LSCM + Sust.	Social + Economic
459	Using agile methods for the development of green and sustainable software: Success factors for GSD vendors	2017	Rashid and Khan	Wiley Online	Multi-Regional	Software	LM + Sust.	Environmental
460	Impacts of Lean Six Sigma over organizational sustainability: A survey study	2017	de Freitas et al.	Science Direct	Multi-Regional	Multi-Sectoral	LM + Sust.	Environmental + Social + Economic
461	Short-term versus long-term benefits: Balanced sustainability framework and research propositions	2017	Wu et al.	Science Direct	Multi-Regional	Theoretical/Conceptual	LM + Sust.	Environmental + Social + Economic
462	Principles of sustainability and practices in the heavy-duty vehicle industry: A study of multiple cases	2017	Hilsdorf et al.	Science Direct	South America	Automotive	LM + Sust.	Economic
463	Can social sustainability values be incorporated in a product service system for temporary public building modules?	2017	Kurdve and Goey	Science Direct	Europe	Construction	LM + Sust.	Social
464	Text mining-based categorization and user perspective analysis ofenvironmental sustainability indicators for manufacturing and servicesystems	2017	Park and Kremer	Science Direct	USA	Multi-Sectoral	LM + Sust.	Environmental
465	Using Lean to Rapidly and Sustainably Transform a Behavioral Health Crisis Program: Impact on Throughput and Safety	2017	Balfour et al.	Science Direct	USA	HealthCare	LM + Sust.	Social + Economic
466	Framing maturity based on sustainable operations management principles	2017	Machado et al.	Science Direct	South America	Theoretical/Conceptual	LM + Sust.	Environmental
467	Is Seru a Sustainable Manufacturing System?	2017	Kaku	Science Direct	Japan	Electronics	LM + Sust.	Environmental + Economic
468	Energy Management in a Manufacturing Industry through Layout Design	2017	Fahad et al.	Science Direct	Asia	Electronics	LM + Sust.	Environmental + Economic
469	Management tool design for eco-efficiency improvements in manufacturing – a case study	2017	Litos et al.	Science Direct	Europe	Plastic/Rubber	LM + Sust.	Environmental + Economic
470	Value uncaptured perspective for sustainable business model innovation	2017	Yang et al.	Science Direct	Multi-Regional	Multi-Sectoral	LM + Sust.	Environmental + Social + Economic
471	A Generic Sankey Tool for Evaluating Energy Value Stream in Manufacturing Systems	2017	Li et al.	Science Direct	Ocenia	Metal	LM + Sust.	Environmental + Economic
472	Socially responsible innovation in health care: Cycles of actualization	2017	Batayeh et al.	Science Direct	USA	HealthCare	LM + Sust.	Environmental + Social + Economic
473	Modeling a Leagility Index for Supply Chain Sustenance	2017	Banerjee and Ganjeizadeh	Science Direct	Multi-Regional	Theoretical/Conceptual	LSCM + Sust.	Environmental + Social + Economic
474	Strategies for Value Creation through Sustainable Manufacturing	2017	Badurdeen and Jawahir	Science Direct	USA	Theoretical/Conceptual	LM + Sust.	Environmental + Social + Economic
475	Towards zero waste manufacturing: A multidisciplinary review	2017	Singh et al.	Science Direct	Asia	Literature Review	LM + Sust.	Environmental + Economic
476	An intelligent value stream-based approach to collaboration of food traceability cyber physical system by fog computing	2017	Chen	Science Direct	Asia	Food/Agriculture	LSCM + Sust.	Social
477	Reducing construction waste: A study of urban infrastructure projects	2017	Magalhaes et al.	Science Direct	South America	Construction	LM + Sust.	Environmental
